# Supplementary material
Source: PubMed Central journal article supplement (PMC4990474)
Supplement: NIHMS794260-supplement-1.pdf [file NIHMS794260-supplement-1.pdf]

## SUPPLEMENTARY INFORMATION

### **Pistol Ribozyme Adopts a Pseudoknot Fold Facilitating Site-specific In-line Cleavage**

**Aiming Ren<sup>1,2,4</sup>, Nikola Vušurović<sup>3,4</sup>, Jennifer Gebetsberger<sup>3</sup>,  
Pu Gao<sup>2</sup>, Michael Juen<sup>3</sup>, Christoph Kreutz<sup>3</sup>,  
Ronald Micura<sup>3</sup> and Dinshaw J. Patel<sup>2</sup>**

<sup>1</sup>Life Sciences Institute, Zhejiang University,  
Hangzhou, 310058, China

<sup>2</sup>Structural Biology Program  
Memorial Sloan-Kettering Cancer  
New York, NY, 10065

<sup>3</sup>Institute of Organic Chemistry  
Leopold-Franzens University and  
Center of Molecular Biosciences CMBI  
Innsbruck A-6020, Austria

<sup>4</sup>These authors made equal contributions

\*Corresponding authors: [pateld@mskcc.org](mailto:pateld@mskcc.org) (DJP) and [ronald.micura@uibk.ac.at](mailto:ronald.micura@uibk.ac.at) (RM)

## SUPPLEMENTARY RESULTS

**Supplementary Table 1. Crystallographic statistics for *env25* pistol ribozyme**

| Crystal                                             | Native                    | [Ir(NH <sub>3</sub> ) <sub>6</sub> ] <sup>3+</sup><br>soak | Mn <sup>2+</sup> soak    |
|-----------------------------------------------------|---------------------------|------------------------------------------------------------|--------------------------|
| <b>Data collection</b>                              | 24-ID-C                   | 24-ID-C                                                    | 24-ID-C                  |
| Space group                                         | P322 <sub>1</sub>         | P322 <sub>1</sub>                                          |                          |
| Cell dimensions                                     |                           |                                                            |                          |
| <i>a, b, c</i> (Å)                                  | 56.2, 56.2, 89.3          | 56.5, 56.5, 88.3                                           | 56.0, 56.0, 89.5         |
| $\alpha, \beta, \gamma$ (°)                         | 90, 90, 120               | 90, 90, 120                                                | 90, 90, 120              |
| Wavelength (Å)                                      | 0.9792                    | 1.1052                                                     | 1.7712                   |
| Resolution (Å)                                      | 89.3-2.73<br>(2.86-2.73)* | 88.3-2.68<br>(2.81-2.68)                                   | 89.5-3.27<br>(3.53-3.27) |
| <i>R</i> <sub>pim</sub>                             | 0.037(0.727)              | 0.038(0.618)                                               | 0.052 (0.589)            |
| <i>I</i> / $\sigma$ <i>I</i>                        | 12.8 (0.9)                | 14.9 (1.2)                                                 | 9.4 (1.1)                |
| Completeness (%)                                    | 99.8 (100)                | 99.8 (100)                                                 | 95.7 (98.5)              |
| Redundancy                                          | 6.2 (6.7)                 | 6.2 (6.4)                                                  | 3.1 (3.2)                |
| <b>Refinement</b>                                   |                           |                                                            |                          |
| Resolution (Å)                                      | 48.7-2.73                 | 49.0-2.68                                                  | 48.5-3.27                |
| No. reflections                                     | 4612                      | 8819                                                       | 3743                     |
| <i>R</i> <sub>work</sub> / <i>R</i> <sub>free</sub> | 0.20/0.25                 | 0.19/0.24                                                  | 0.24/0.29                |
| No. atoms                                           |                           |                                                            |                          |
| RNA                                                 | 1237                      | 1237                                                       | 1237                     |
| Cations                                             | 3                         | 7                                                          | 2                        |
| Water                                               | 1                         | 15                                                         | 2                        |
| B-factors                                           |                           |                                                            |                          |
| RNA                                                 | 112.7                     | 103.8                                                      | 129.2                    |
| Cations                                             | 94.9                      | 107.8                                                      | 112.2                    |
| Water                                               | 103.4                     | 85.1                                                       | 83.1                     |
| R.m.s deviations                                    |                           |                                                            |                          |
| Bond lengths (Å)                                    | 0.017                     | 0.009                                                      | 0.004                    |
| Bond angles (°)                                     | 1.45                      | 1.04                                                       | 1.07                     |

\*Values for the highest-resolution shell are in parentheses.

## SUPPLEMENTARY FIGURE CAPTIONS

**Supplementary Figure 1. Long-range pairing alignments in the structure of the *env25* pistol ribozyme.** **a**, Representation of the continuous stacking alignment involving stem segments (starting from the bottom) P3, non-canonical paired segment, PK and P1. **b**, Hydrogen-bond network involving the U17-A18-A19-A20-A21-(U20)-A23 segment and the minor groove of stem P1. **c**, The minor groove triple involving the minor groove edge of G24 and the Watson-Crick G5-C12 pair. G5 is a highly conserved residue in the pistol ribozyme. **d**, Mg<sup>2+</sup> binding site close to, but not directly coordinated to, the catalytic cleavage G53-U54 site in the pistol ribozyme. **e**, An expended view of the bound Mn<sup>2+</sup> cation-binding site at the G53-U54 cleavage site in the pistol ribozyme, with the Mn<sup>2+</sup> anomalous electron density map contoured at  $\sigma$  level. Mn<sup>2+</sup> cation is shown as a purple sphere.

**Supplementary Figure 2. Self-cleavage of the *env25* pistol ribozyme.** **a**, Cartoon presentation of the cleavage assay. **b**, HPLC trace of wild type (WT), and mutants **c**, A32U, and **d**, A32G. Cleavage analyzed at 55  $\mu$ M RNA each strand; 2 mM MgCl<sub>2</sub>, 100 mM KCl, 30 mM HEPES, pH 7.5, 23 °C. R 47-nt ribozyme, S 11-nt substrate; C1 and C2, 6-nt and 5-nt cleavage products. HPLC conditions: Dionex DNAPac colum (4 x 250 mm), 80 °C, 1 mL min<sup>-1</sup>, 0–60% buffer B in 45 min. Buffer A: Tris–HCl (25 mM), urea (6 M), pH 8.0. Buffer B: Tris–HCl (25 mM), urea (6 M), NaClO<sub>4</sub> (0.5 M), pH 8.0.

**Supplementary Figure 3. NMR spectroscopic demonstration of stem P2 formation of the *env25* pistol ribozyme in solution.** **a**, Chemical structures of

$^{15}\text{N}1/3$ -labeled U26 used. **b**,  $^1J(^1\text{H}, ^{15}\text{N})$  HSQC spectra of the  $^{15}\text{N}$ -U26 pistol complex showing the appearance of a correlation corresponding to substrate binding.

**Supporting Figure 4. NMR spectroscopic analysis of the *env25* pistol ribozyme in solution – reference experiments.** **a**, Chemical structure of the  $^{13}\text{C}2$ -labeled adenosine used. **b**,  $^1J(^1\text{H}, ^{13}\text{C})$  HSQC spectra of a short RNA duplex with labeled A in a Watson-Crick base pair at varying pH values; the protonated form is in slow exchange; estimated  $\text{pK}_a$  value as indicated. **c**, Exemplary  $^1J(^1\text{H}, ^{13}\text{C})$  HSQC spectra of pH-dependent NMR experiments of a  $^{13}\text{C}2$ -A labeled single-stranded RNA (left), chemical shift changes of  $^{13}\text{C}2$ -A, with changes in the pH value derived from  $^1J(^1\text{H}, ^{13}\text{C})$  HSQC spectra (right); the line represents the least-square fit (also see reference<sup>44</sup>) estimated  $\text{pK}_a$  values as indicated. Conditions:  $c(\text{RNA}) = 80$  to  $120 \mu\text{M}$ ;  $25 \text{ mM NaCl}$ ,  $2 \text{ mM MgCl}_2$ ,  $15 \text{ mM sodium phosphate}$ ,  $\text{H}_2\text{O}/\text{D}_2\text{O} 9:1$ ,  $298 \text{ K}$ .

**Supplementary Figure 5. Temperature dependence of the cleavage kinetics of the *env25* pistol ribozyme.** **a**, Chemical structure of Ap nucleoside used. **b**, Quantitative assay for rate determination at  $20 \text{ }^\circ\text{C}$ . Exemplary fluorescence time course recorded at two different temperatures can be compared as shown in panel b ( $20 \text{ }^\circ\text{C}$ ) and Fig. 6c ( $15 \text{ }^\circ\text{C}$ ).

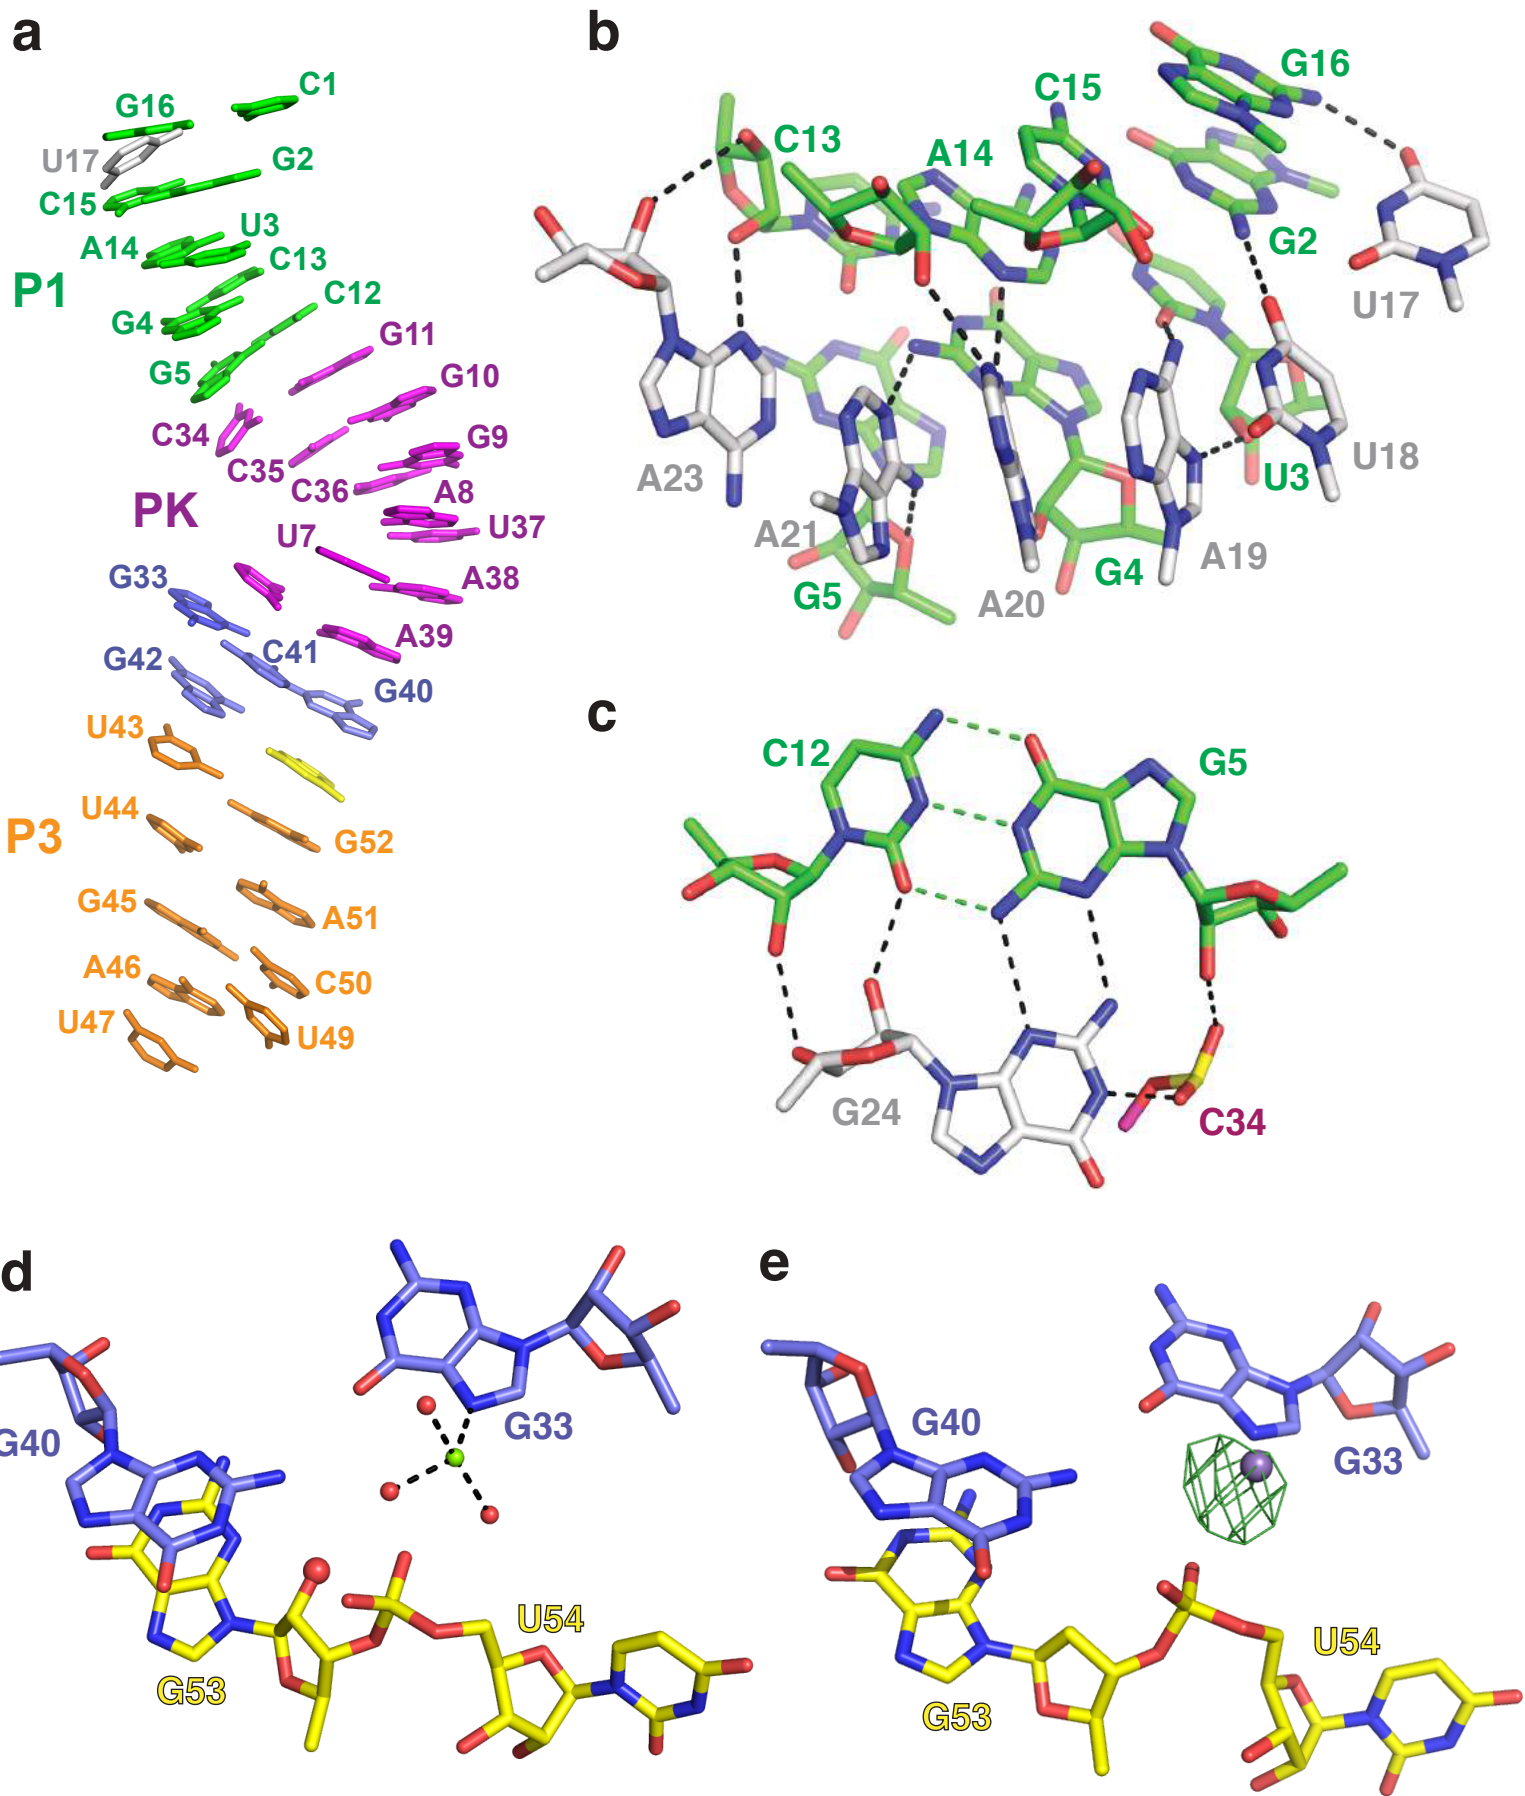

Sup. Fig. 1

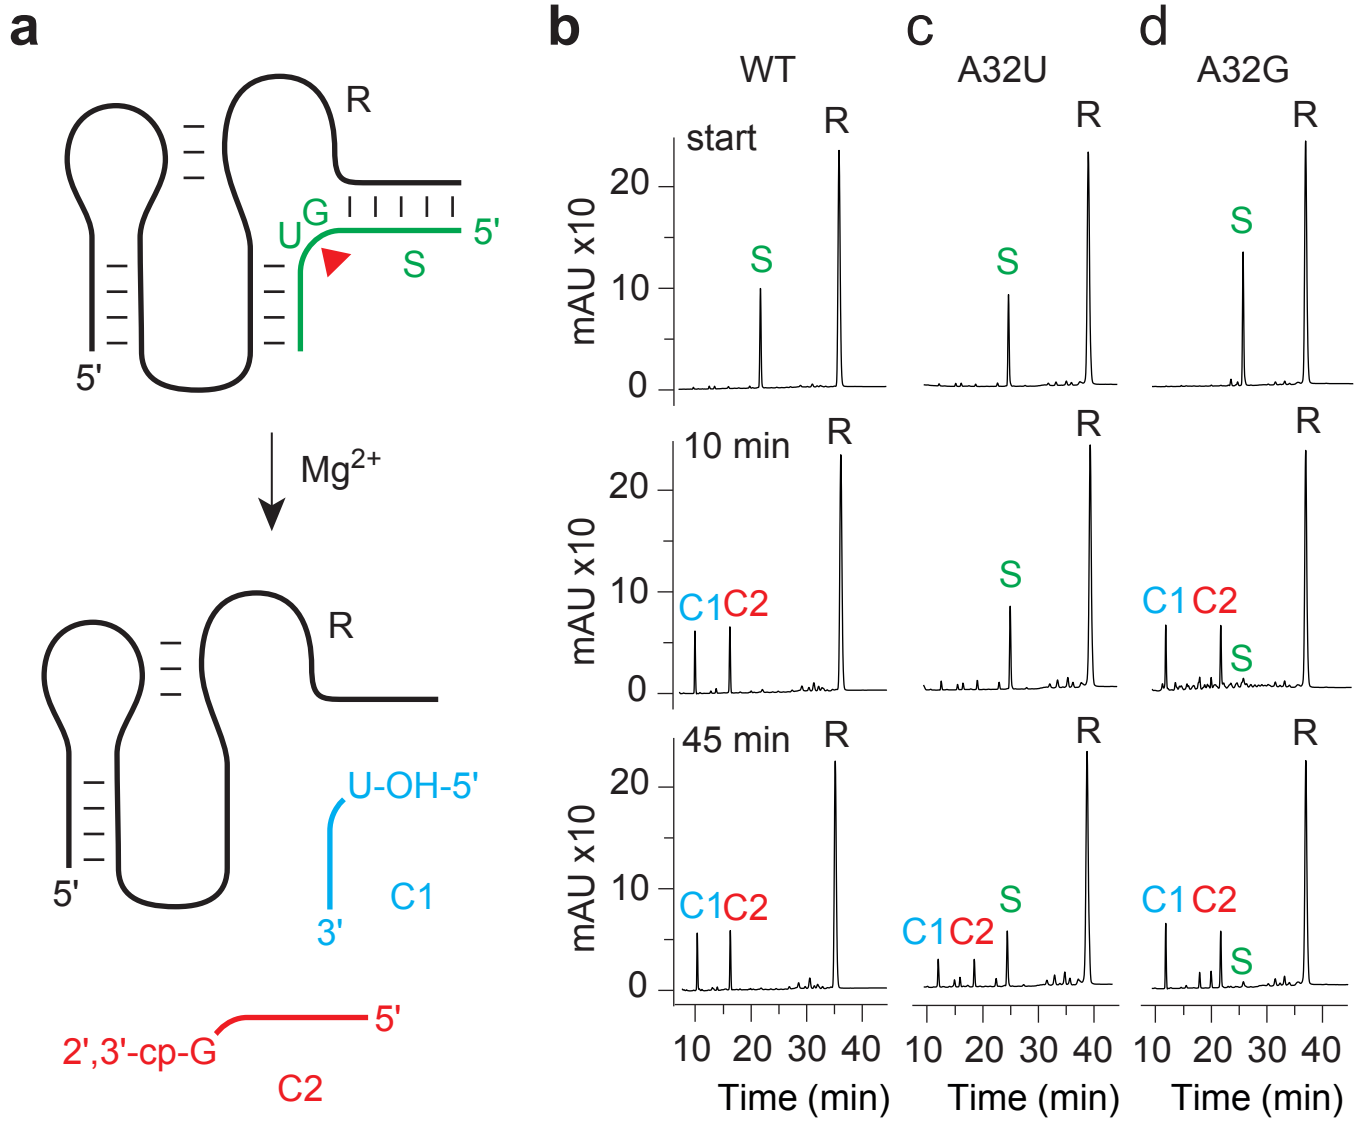

**Sup. Fig. 2**

**a**

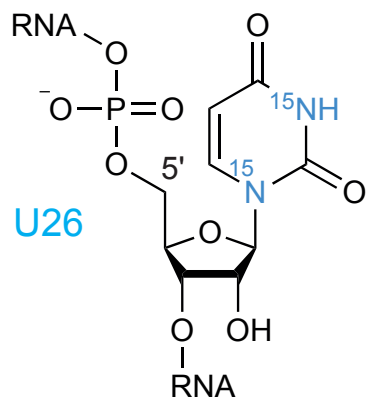

**b**

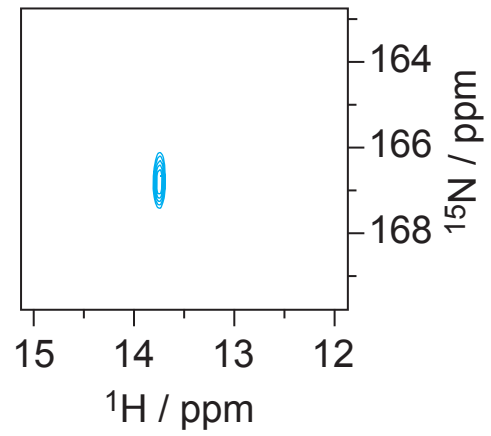

**Sup. Fig. 3**

**a**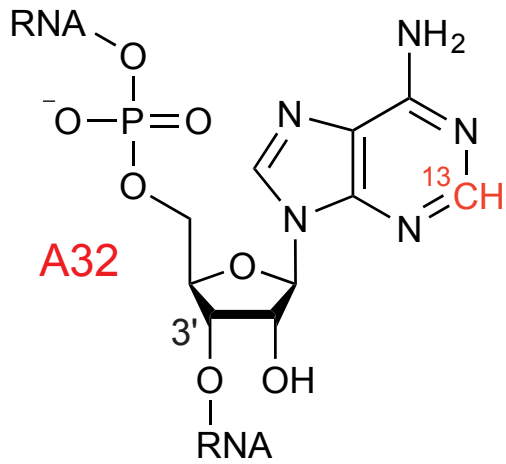**b**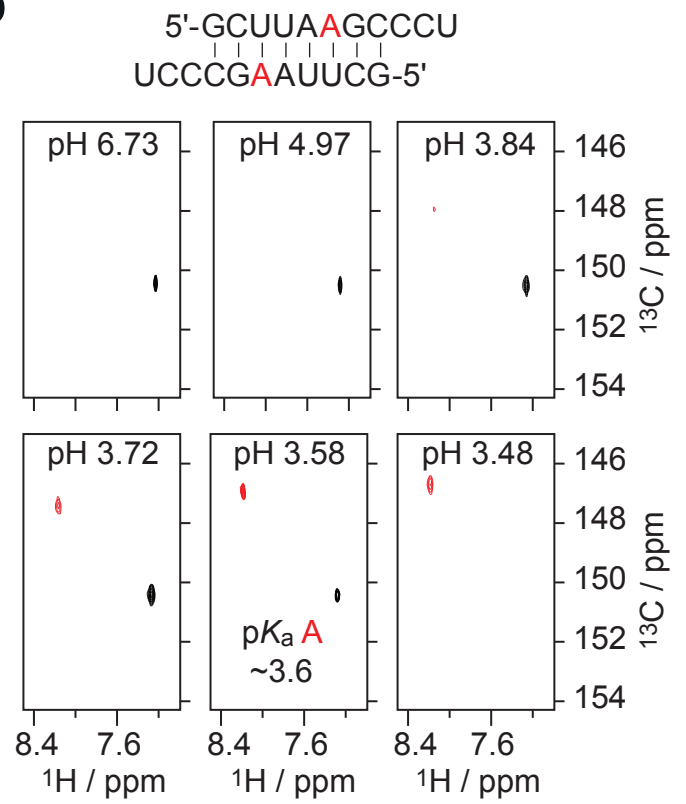**c**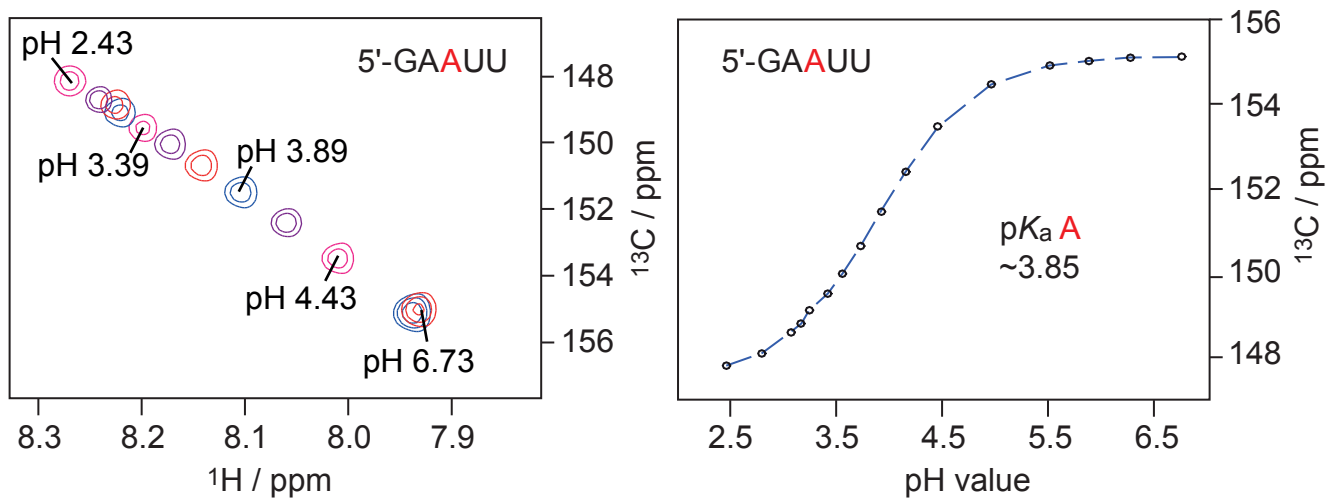**Sup. Fig. 4**



**a**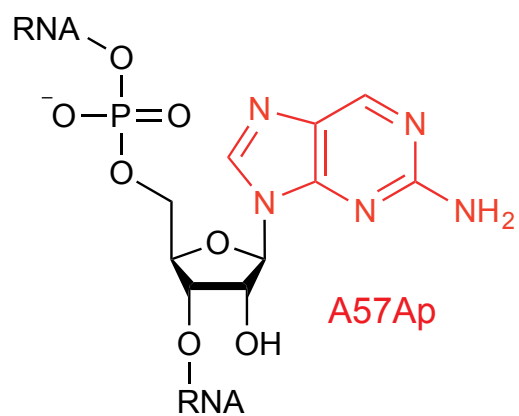**b**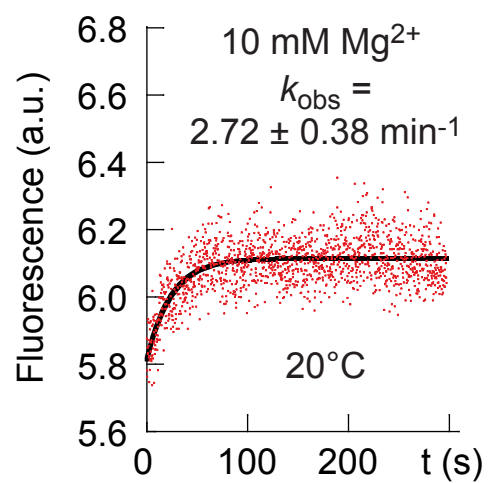**Sup. Fig. 5**
